# Supplementary material
Source: publisher site journal article supplement (https://arthropod-systematics.arphahub.com/article/66319/download/suppl/33/)
Supplement: Supplementary file 1

## Sheet: featamp
Supplementary material 3: Model parameters estimated with ENMeval (Muscarella et al. 2014)
Model parameters for Poecilimon ampliatus						Model parameters for P. intermedius
Model #	Feature class	Regularization multiplier	AICc	Delta AIC	AUC	Model #	Feature class	Regularization multiplier	AICc	Delta AICc	AUC
1	L	0.5	594.843	59.8814	0.957386	1	L	0.5	1562.72	36.8325	0.837044
2	LQ	0.5	568.422	33.4608	0.982639	2	LQ	0.5	1534.94	9.0479	0.887426
3	H	0.5	630.962	96.0005	0.988664	3	H	0.5	1653.66	127.767	0.919756
4	LQH	0.5	661.218	126.257	0.988061	4	LQH	0.5	1588.94	63.0541	0.926271
5	LQHP	0.5	631.794	96.8325	0.989555	5	LQHP	0.5	1601.83	75.9448	0.924867
6	LQHPT	0.5	NA	NA	0.991205	6	LQHPT	0.5	NA	NA	0.949273
7	L	1	592.937	57.9756	0.958177	7	L	1	1563.08	37.1887	0.827642
8	LQ	1	554.076	19.115	0.978283	8	LQ	1	1541.68	15.7895	0.875193
9	H	1	589.554	54.5926	0.986536	9	H	1	1565.1	39.2134	0.893016
10	LQH	1	580.029	45.0677	0.985973	10	LQH	1	1525.89	0	0.899265
11	LQHP	1	589.144	54.1826	0.98627	11	LQHP	1	1552.63	26.7451	0.889667
12	LQHPT	1	911.773	376.811	0.988602	12	LQHPT	1	1557.38	31.4895	0.895054
13	L	1.5	586.845	51.8835	0.956236	13	L	1.5	1563	37.1132	0.82321
14	LQ	1.5	552.806	17.845	0.977614	14	LQ	1.5	1540.55	14.6634	0.864958
15	H	1.5	538.462	3.5006	0.985498	15	H	1.5	1557.2	31.3165	0.878167
16	LQH	1.5	543.235	8.27339	0.984823	16	LQH	1.5	1536.84	10.9564	0.881452
17	LQHP	1.5	556.814	21.8531	0.984961	17	LQHP	1.5	1544.82	18.9308	0.877882
18	LQHPT	1.5	570.5	35.5384	0.986242	18	LQHPT	1.5	1540.38	14.4939	0.883536
19	L	2	584.396	49.4341	0.956492	19	L	2	1567.67	41.78	0.814859
20	LQ	2	557.804	22.8422	0.977292	20	LQ	2	1539.2	13.3123	0.860121
21	H	2	546.665	11.7033	0.984623	21	H	2	1552.77	26.885	0.871128
22	LQH	2	548.821	13.8595	0.983552	22	LQH	2	1537.15	11.2663	0.872334
23	LQHP	2	543.978	9.0168	0.984305	23	LQHP	2	1546.78	20.8889	0.870844
24	LQHPT	2	553.115	18.154	0.985102	24	LQHPT	2	1533.28	7.3891	0.876989
25	L	2.5	585.105	50.1433	0.957036	25	L	2.5	1567.82	41.9313	0.809295
26	LQ	2.5	552.731	17.7693	0.97732	26	LQ	2.5	1543.07	17.1794	0.856037
27	H	2.5	534.961	0	0.983705	27	H	2.5	1553.96	28.0668	0.866186
28	LQH	2.5	554.852	19.8911	0.982789	28	LQH	2.5	1541.35	15.4605	0.868063
29	LQHP	2.5	563.059	28.0971	0.983483	29	LQHP	2.5	1543.32	17.4336	0.867993
30	LQHPT	2.5	552.36	17.3983	0.984408	30	LQHPT	2.5	1539.91	14.0181	0.873571
31	L	3	585.961	51	0.957683	31	L	3	1563.94	38.0472	0.806714
32	LQ	3	556.676	21.7149	0.977377	32	LQ	3	1546.98	21.089	0.851827
33	H	3	540.554	5.59253	0.982833	33	H	3	1561.73	35.8446	0.861629
34	LQH	3	550.023	15.062	0.982242	34	LQH	3	1544.96	19.0752	0.864097
35	LQHP	3	556.862	21.9004	0.98283	35	LQHP	3	1539.83	13.9374	0.865801
36	LQHPT	3	547.003	12.0419	0.983723	36	LQHPT	3	1544.1	18.2089	0.868862
37	L	3.5	586.954	51.9931	0.958386	37	L	3.5	1564.52	38.6275	0.805794
38	LQ	3.5	549.918	14.9562	0.977473	38	LQ	3.5	1547.69	21.7983	0.84837
39	H	3.5	542.047	7.08546	0.981886	39	H	3.5	1558.92	33.0333	0.857574
40	LQH	3.5	555.187	20.226	0.98177	40	LQH	3.5	1541.5	15.608	0.861971
41	LQHP	3.5	548.13	13.1684	0.982289	41	LQHP	3.5	1548.41	22.5208	0.863749
42	LQHPT	3.5	553.144	18.1829	0.983048	42	LQHPT	3.5	1551.38	25.493	0.86423
43	L	4	588.067	53.1058	0.95918	43	L	4	1565.07	39.1841	0.804908
44	LQ	4	550.824	15.8626	0.977492	44	LQ	4	1550.06	24.17	0.846479
45	H	4	544.084	9.12296	0.981098	45	H	4	1562.2	36.307	0.853599
46	LQH	4	545.985	11.0232	0.980911	46	LQH	4	1546.11	20.2251	0.86048
47	LQHP	4	543.849	8.88748	0.981736	47	LQHP	4	1554.39	28.5044	0.86057
48	LQHPT	4	549.758	14.7968	0.982477	48	LQHPT	4	1554.39	28.5044	0.86057
